# Supplementary material for: Evaluating the Impact of Seismic Activity on the Slope Stability of the Western Coast of Lefkada Island Using Remote Sensing Techniques, Geographical Information Systems, and Field Data
Source: MDPI journal article supplement (doi:10.3390/app13169434), 2023-08-20
Supplement: s1 [file s1]

Supplementary images for the 2003 earthquake.

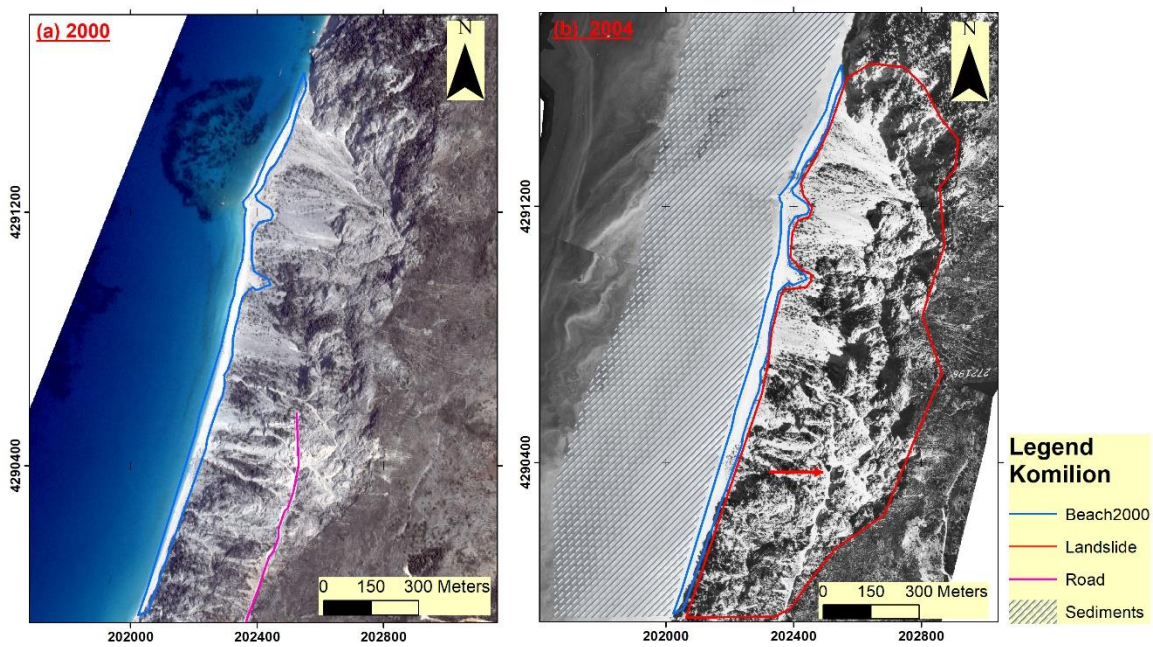

S1. The effects of the 2003 earthquake on Komilio coast

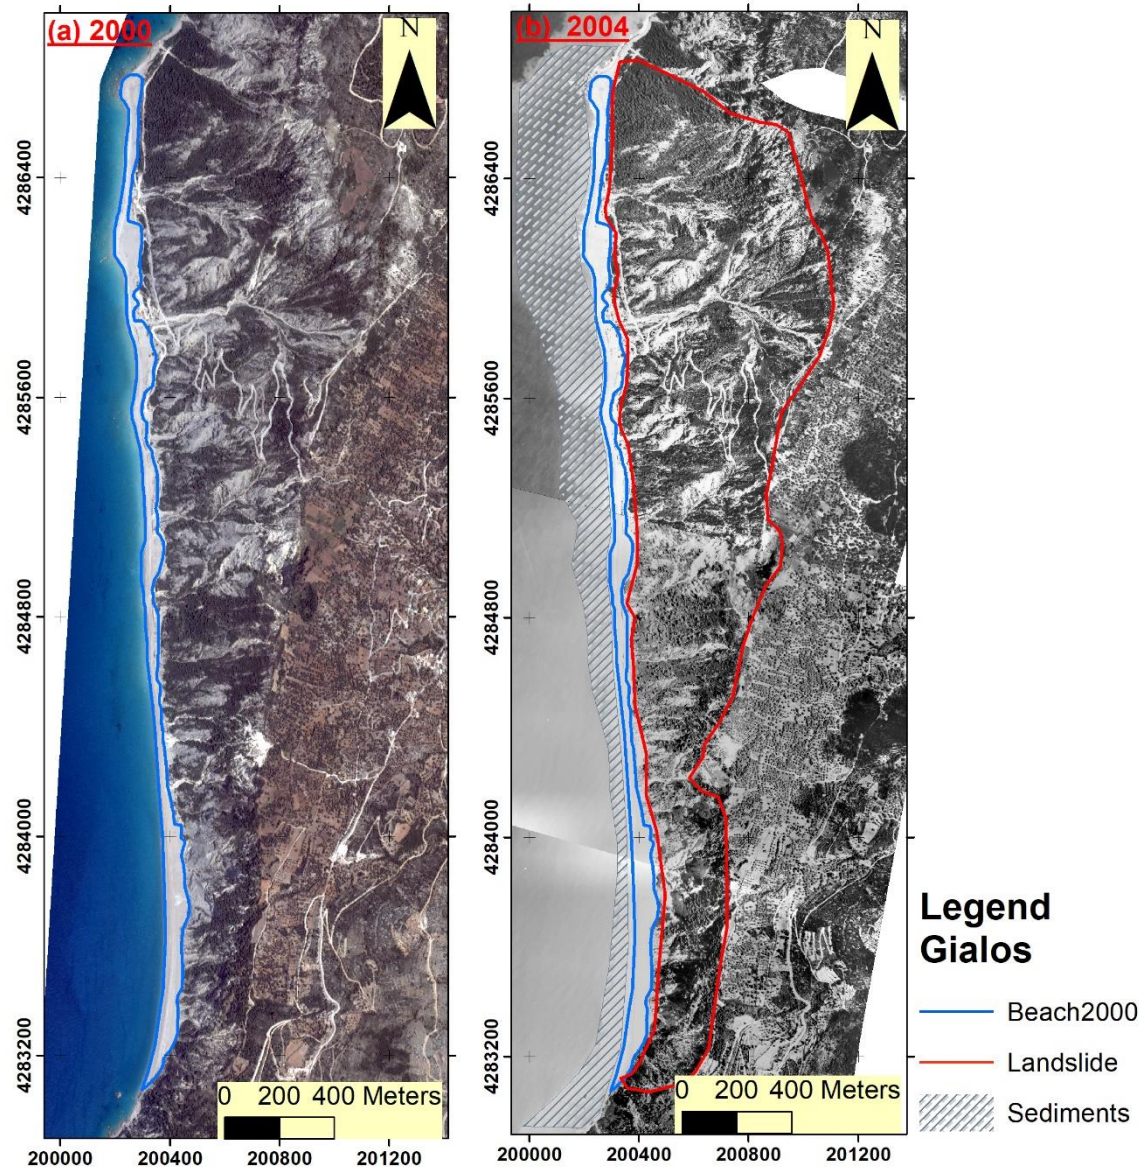

S2. The effects of the 2003 earthquake on Gialos coast
