# Supplementary material for: Evaluating the Impact of Seismic Activity on the Slope Stability of the Western Coast of Lefkada Island Using Remote Sensing Techniques, Geographical Information Systems, and Field Data
Source: MDPI journal article supplement (doi:10.3390/app13169434), 2023-08-20
Supplement: s1 [file s1]

Archive with 1 entries (1 files):
- applsci-2535332-supplementary.pdf
